# Supplementary material
Source: ML conference proceedings conference paper supplement (https://openaccess.thecvf.com/content/WACV2023/html/Uehara_K-VQG_Knowledge-Aware_Visual_WACV_2023_paper.html)
Supplement: Supplementary file 1 [file Uehara_K-VQG_Knowledge-Aware_Visual_WACV_2023_supplemental.pdf]

# Appendix for K-VQG: Knowledge-aware Visual Question Generation for Common-sense Acquisition

## 1. Details of Target Knowledge Parser

Following K-VQG model, we used a model that consists of a UNITER-based encoder [2] and BART-based decoder [3] as our Target Knowledge Parser model. The encoder takes the visual embeddings  $v$  and the tokenized question  $q$ . We used region features obtained from Faster R-CNN [1] as visual embeddings, as in our VQG model. The question is tokenized into input sequences using WordPiece tokenizer [4].

Our model is trained to minimizing the negative conditional log-likelihood loss function can be expressed through the following equation:

$$L = - \sum_{n=1}^{|k|} \log P_{\theta}(k_n | k_{<n}, h_t) \quad (1)$$

where  $h_t = \text{Enc}(v, q)$ , and  $k = \{w_h, w_{[\text{SEP}]}, w_r, w_{[\text{SEP}]}, w_t\}$ . is a special token that indicates the separation of each part, and  $w_h, w_r, w_t, w_{[\text{SEP}]}$  denote the tokens of the head, relation, tail phrases and special token, respectively.

## 2. Additional Examples of the K-VQG Dataset

We show additional examples of the K-VQG dataset below.

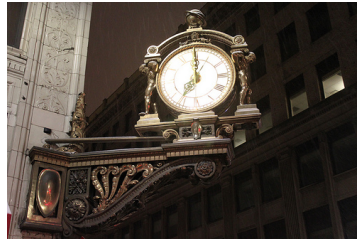

- K.** [MASK], IsA, fine arts
- A.** sculpture
- Q.** what is kind of fine arts which is modeled into certain figures?

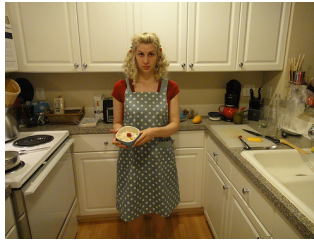

- K.** [MASK], UsedFor, store spices
- A.** cabinet
- Q.** what is the white object behind the woman's head that could be used to store spices?

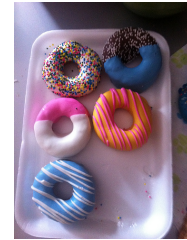

- K.** tray, UsedFor, [MASK]
- A.** hold food items
- Q.** what is the ceramic object on top of the table used for?

## References

- [1] Peter Anderson, Xiaodong He, Chris Buehler, Damien Teney, Mark Johnson, Stephen Gould, and Lei Zhang. Bottom-up and top-down attention for image captioning and visual question answering. In *CVPR*, 2018.
- [2] Yen-Chun Chen, Linjie Li, Licheng Yu, Ahmed El Kholy, Faisal Ahmed, Zhe Gan, Yu Cheng, and Jingjing Liu. UNITER: Universal image-text representation learning. In *ECCV*, 2020.
- [3] Mike Lewis, Yinhan Liu, Naman Goyal, Marjan Ghazvininejad, Abdelrahman Mohamed, Omer Levy, Veselin Stoyanov, and Luke Zettlemoyer. BART: Denoising sequence-to-sequence pre-training for natural language generation, translation, and comprehension. In *ACL*, July 2020.
- [4] Yonghui Wu, Mike Schuster, Zhifeng Chen, Quoc V Le, Mohammad Norouzi, Wolfgang Macherey, Maxim Krikun, Yuan Cao, Qin Gao, Klaus Macherey, et al. Google's neural machine translation system: Bridging the gap between human and machine translation. *arXiv preprint arXiv:1609.08144*, 2016.

Figure 1. Additional examples of the K-VQG dataset (1)

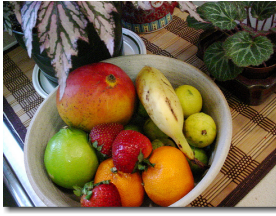

- K. [MASK], CreatedBy, seed
- A. plant
- Q. what is the name of the object to the right of the fruit that can be grown from seed?

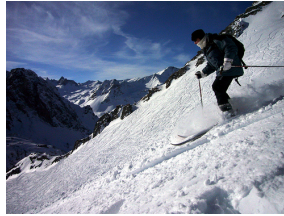

- K. ski, HasSubEvent, [MASK]
- A. hit slopes
- Q. what do you do with the footwear the man is wearing?

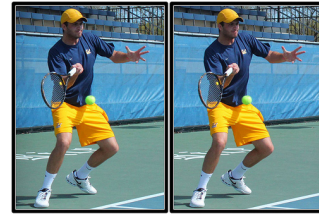

- K. [MASK], IsA, sports shirt
- A. jersey
- Q. what is the sports shirt worn by the tennis player?

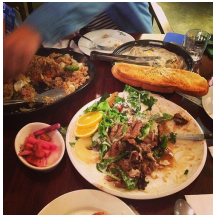

- K. [MASK], CreatedBy, baker
- A. bread
- Q. what is the object called that is created by a baker and sitting on top of the bowl?

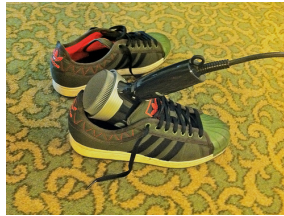

- K. [MASK], DefinedAs, part of object designed to be grasped by hand
- A. handle
- Q. what is the black shiny item that is designed to be grasped by the hand and is inside a shoe?

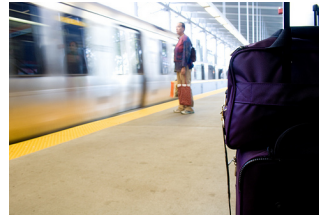

- K. [MASK], AtLocation, shopping mall
- A. bag
- Q. what kind of an object is carried to the shopping mall for purchase?

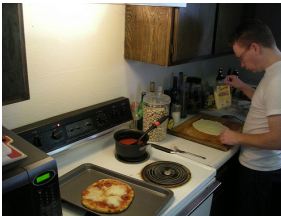

- K. [MASK], MadeUpOf, cheese
- A. pizza
- Q. what is in the tray and is made up of cheese?

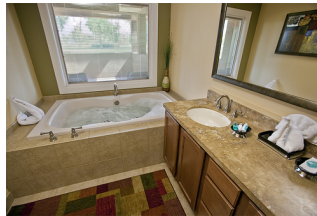

- K. [MASK], UsedFor, soak in
- A. bathtub
- Q. what object against the wall can fill with water to soak in?

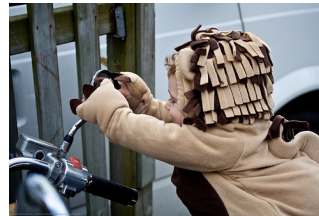

- K. tire, MadeUpOf, [MASK]
- A. rubber
- Q. what is the black outside of a tire made of?

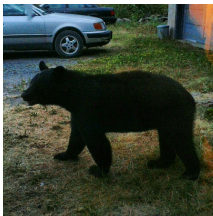

- K. [MASK], CapableOf, hunt rabbit
- A. bear
- Q. which animal have a capable of to hunt rabbit for their food?

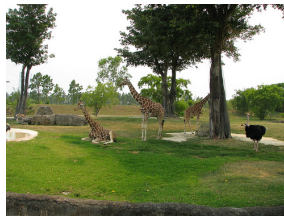

- K. [MASK], DefinedAs, tallest land animal
- A. giraffe
- Q. what is the animal standing in the grass that is defined as the tallest land animal?

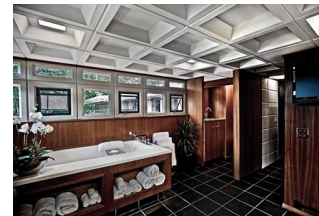

- K. [MASK], Desires, water and sun
- A. plant
- Q. what is the object that needs water and sun which is against the wooden wall?

Figure 2. Additional examples of the K-VQG dataset (2)

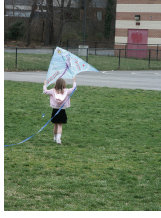

- K. kite, AtLocation, [MASK]  
 A. park  
 Q. where do you traditionally play with the toy the kid is holding?

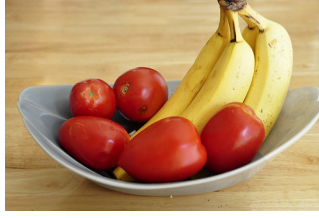

- K. [MASK], HasProperty, yellow  
 A. banana  
 Q. what is the yellow fruit on the right called?

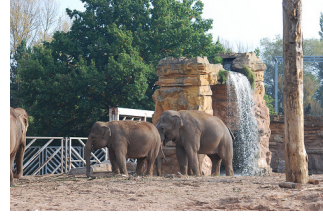

- K. [MASK], HasA, nose  
 A. elephant  
 Q. what is the animal standing near the fence that has a long nose?

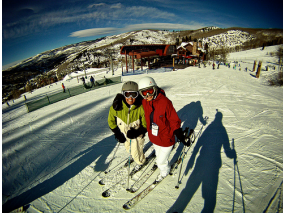

- K. ski, HasPrerequisite, [MASK]  
 A. go to ski mountain  
 Q. what do you need when you go to ski mountain?

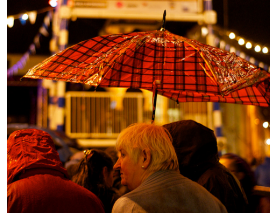

- K. flag, CapableOf, [MASK]  
 A. wave from pole  
 Q. what can the row of colorful objects do when hanging outside?

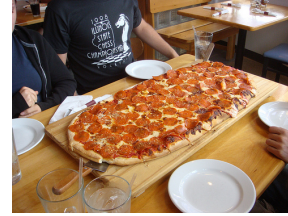

- K. [MASK], UsedFor, sit down on  
 A. bench  
 Q. what flat wooden surface next to the table can people sit down on?

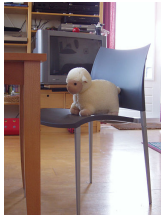

- K. [MASK], IsA, device  
 A. television  
 Q. what electronic device is in the wooden entertainment center?

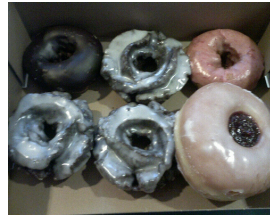

- K. [MASK], IsA, breakfast food  
 A. doughnut  
 Q. what is the dark round object that is often ate at breakfast time?

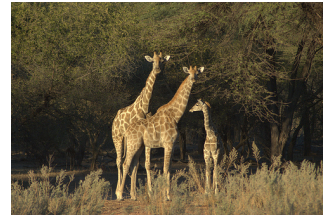

- K. [MASK], HasProperty, long neck  
 A. giraffe  
 Q. what is the large animal with the long tall neck?

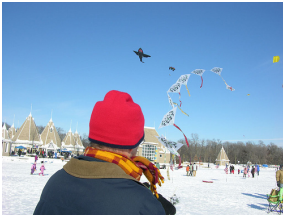

- K. hat, UsedFor, [MASK]  
 A. prottecting head  
 Q. what is the red thing the man is wearing used for?

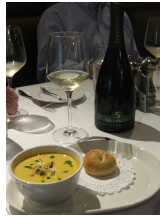

- K. [MASK], ReceivesAction, served in bowl  
 A. soup  
 Q. which item, served in bowl, is next to the roll?

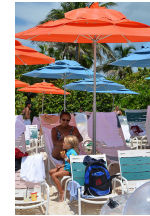

- K. [MASK], CapableOf, shade people from sun  
 A. umbrella  
 Q. what large red item on the metal pole is helping to shade people from sun?

Figure 3. Additional examples of the K-VQG dataset (3)
